# Supplementary material
Source: PubMed Central journal article supplement (PMC2785184)
Supplement: supp_M109.054056_jbc.M109.054056-1.pdf [file supp_M109.054056_jbc.M109.054056-1.pdf]

**Supplemental Table 1** Plasma concentration of TCA-precipitable [<sup>125</sup>I]Aβ<sub>1-40</sub> after intravenous administration from the jugular vein in 2-month-old wild-type and 25-month-old wild-type and *Ttpa*<sup>-/-</sup> mice.

| Time (min) | Plasma concentration (fmol/mL) |                        |                                         |
|------------|--------------------------------|------------------------|-----------------------------------------|
|            | 2-month-old wild-type          | 25-month-old wild-type | 25-month-old <i>Ttpa</i> <sup>-/-</sup> |
| 1          | 1160 ± 56                      | 420 ± 49**             | 870 ± 170 <sup>#</sup>                  |
| 3          | 501 ± 17                       | 265 ± 29**             | 523 ± 67 <sup>##</sup>                  |
| 5          | 316 ± 18                       | 238 ± 51               | 401 ± 64                                |
| 10         | 181 ± 8                        | 161 ± 30               | 301 ± 97                                |
| 15         | 131 ± 9                        | 84.9 ± 12.4*           | 204 ± 80                                |
| 30         | 56.1 ± 5.4                     | 54.8 ± 5.6             | 71.2 ± 13.5                             |
| 60         | 30.6 ± 0.6                     | 32.2 ± 1.4             | 58.1 ± 12.0 <sup>#</sup>                |
| 120        | 15.0 ± 0.7                     | 19.9 ± 3.3             | 25.5 ± 4.4                              |
| 360        | 11.3 ± 0.6                     | 10.2 ± 0.9             | 29.3 ± 8.0 <sup>#</sup>                 |

Each value represents the average ± SEM (n = 4 - 5).

\*p < 0.05, \*\*p < 0.01, significantly different between 2- and 25-month-old wild-type mice

<sup>#</sup>p < 0.05, <sup>##</sup>p < 0.01, significantly different between 25-month-old wild-type and *Ttpa*<sup>-/-</sup> mice.

**Supplemental Table 2** Pharmacokinetic parameters of TCA-precipitable [<sup>125</sup>I]Aβ<sub>1-40</sub> in 2-month-old wild-type and 25-month-old wild-type and *Ttpa*<sup>-/-</sup> mice after intravenous administration.

|                                           | 2-month-old<br>wild-type | 25-month-old<br>wild-type | 25-month-old<br><i>Ttpa</i> <sup>-/-</sup> |
|-------------------------------------------|--------------------------|---------------------------|--------------------------------------------|
| A. Model-independent moment analysis      |                          |                           |                                            |
| AUC (pmol min/mL)                         | 16.1 ± 1.0               | 13.1 ± 1.5                | 36.2 ± 17 <sup>*,#</sup>                   |
| CL <sub>tot</sub> (mL/min/kg)             | 5.05 ± 0.15              | 4.34 ± 0.32 <sup>*</sup>  | 2.55 ± 0.50 <sup>##</sup>                  |
| MRT (min)                                 | 184 ± 27                 | 184 ± 43                  | 537 ± 395                                  |
| V <sub>dss</sub> (L/kg)                   | 0.931 ± 0.135            | 0.802 ± 0.211             | 1.27 ± 0.86                                |
| <i>k<sub>e</sub></i> (min <sup>-1</sup> ) | 0.00334 ± 0.00049        | 0.00406 ± 0.00097         | 0.00196 ± 0.00101 <sup>##</sup>            |
| B. Model dependent analysis               |                          |                           |                                            |
| AUC (pmol min/mL)                         | 14.9 ± 0.7               | 12.5 ± 1.2                | 33.1 ± 13.7 <sup>*,##</sup>                |
| CL <sub>tot</sub> (mL/min/kg)             | 5.48 ± 0.38              | 4.58 ± 0.57               | 2.71 ± 0.41 <sup>##</sup>                  |
| A (fmol/mL)                               | 639 ± 48                 | 310 ± 44 <sup>*</sup>     | 706 ± 210 <sup>##</sup>                    |
| α (min <sup>-1</sup> )                    | 0.123 ± 0.013            | 0.126 ± 0.029             | 0.118 ± 0.027                              |
| B (fmol/mL)                               | 26.6 ± 4.0               | 36.2 ± 13.8               | 36.7 ± 22.9                                |
| <i>β</i> (min <sup>-1</sup> )             | 0.00276 ± 0.00051        | 0.00366 ± 0.00154         | 0.00179 ± 0.00149                          |

The pharmacokinetic parameters of [<sup>125</sup>I]Aβ<sub>1-40</sub> plasma concentration profile after intravenous administration were determined by (A) model-independent moment analysis according to Experimental Procedures and (B) model-dependent analysis applying the MULTI program (1) to the bi-exponential equation:

$$C(t) = Ae^{-\alpha t} + Be^{-\beta t}$$

where C(t) = TCA precipitable [<sup>125</sup>I]Aβ<sub>1-40</sub> fmol per milliliter of plasma, A and B are the intercepts, and α and β are the slopes of the biexponential curve. The AUC and the total body clearance were calculated by following equation:

$$AUC = A/\alpha + B/\beta$$

$$CL_{tot} = \text{Dose}/AUC$$

Each value represents the average ± SD (n = 4 - 5).

\*p < 0.05, \*\*p < 0.01, significantly different from 2-month-old wild-type mice.

<sup>#</sup>p < 0.05, <sup>##</sup>p < 0.01, significantly different from 25-month-old wild-type mice.

#### REFERENCES for Supplemental Table 2

1. Yamaoka, K., Tanigawara, Y., Nakagawa, T., and Uno, T. (1981) *J Pharmacobiodyn* **4**,

879-885

**Supplemental Table 3A** The ratio of mRNA expressions of top 31 genes in the AlzGene profile (<http://www.alzgene.org>) in brains of 23-month-old *Ttpa*<sup>-/-</sup> and wild-type mice.

| Description                                                                                              | GeneName    | Ratio of <i>Ttpa</i> <sup>-/-</sup> /WT |
|----------------------------------------------------------------------------------------------------------|-------------|-----------------------------------------|
| Apolipoprotein E (ApoE), mRNA [NM_009696]                                                                | ApoE        | 1.013                                   |
| Cholinergic receptor, nicotinic, beta polypeptide 2 (neuronal) (Chrb2), mRNA [NM_009602]                 | Chrb2       | 1.010                                   |
| Growth factor receptor bound protein 2-associated protein 2 (Gab2), mRNA [NM_010248]                     | Gab2        | no reliable data obtained               |
| Cholesterol 25-hydroxylase (Ch25h), mRNA [NM_009890]                                                     | Ch25h       | 0.556                                   |
| Hybrid receptor gp250 precursor, mRNA, partial cds. [AF031816]                                           | Sor11       | 0.875                                   |
| Tumor necrosis factor (Tnf), mRNA [NM_013693]                                                            | Tnf         | no reliable data obtained               |
| Ornithine transcarbamylase (Otc), mRNA [NM_008769]                                                       | Otc         | no reliable data obtained               |
| Cystatin C (Cst3), mRNA [NM_009976]                                                                      | Cst3        | 1.042                                   |
| Angiotensin I converting enzyme (peptidyl-dipeptidase A) 1 (Ace), transcript variant 2, mRNA [NM_009598] | Ace         | 1.129                                   |
| Microtubule-associated protein tau (Mapt), transcript variant 1, mRNA [NM_001038609]                     | Mapt        | 1.052                                   |
| Microtubule-associated protein tau (Mapt), transcript variant 2, mRNA [NM_010838]                        | Mapt        | 1.016                                   |
| VPS10 domain receptor protein SORCS 1 (Sorcs1), mRNA [NM_021377]                                         | Sorcs1      | 1.052                                   |
| Not defined                                                                                              | hCG2039140  | no reliable data obtained               |
| Transcription factor A, mitochondrial (Tfam), mRNA [NM_009360]                                           | Tfam        | 0.981                                   |
| RIKEN cDNA 4921509E05 gene, mRNA (cDNA clone IMAGE:6813822), partial cds. [BC059882]                     | Pgbd1       | 1.725                                   |
| Calcium homeostasis modulator 1 (family with sequence similarity 26, member C)                           | CALHM1      | no reliable data obtained               |
| Interleukin 33 (Il33), mRNA [NM_133775]                                                                  | Il33        | 0.908                                   |
| Interleukin 1 beta (Il1b), mRNA [NM_008361]                                                              | Il1b        | 0.642                                   |
| Transferrin (Trf), mRNA [NM_133977]                                                                      | Trf         | 0.934                                   |
| Tyrosine kinase, non-receptor, 1 (Tnk1), mRNA [NM_031880]                                                | Tnk1        | no reliable data obtained               |
| Ribosomal protein S3a (Rps3a), mRNA [NM_016959]                                                          | Rps3a       | 1.011                                   |
| Glyceraldehyde-3-phosphate dehydrogenase, spermatogenic (Gapdhs), mRNA [NM_008085]                       | Gapdhs      | no reliable data obtained               |
| Death associated protein kinase 1 (Dapk1), transcript variant 1, mRNA [NM_029653]                        | Dapk1       | 1.105                                   |
| Not defined                                                                                              | GWA_14q31.2 | no reliable data obtained               |
| Prion protein (Prnp), mRNA [NM_011170]                                                                   | Prnp        | 1.074                                   |
| Galanin-like peptide precursor (Galp), mRNA [NM_178028]                                                  | Galp        | no reliable data obtained               |
| 5,10-methylenetetrahydrofolate reductase (Mthfr), mRNA [NM_010840]                                       | Mthfr       | 0.972                                   |

LOC651924 similar to Ubiquitin-like 1-activating enzyme E1B (SUMO-1-activating enzyme subunit 2) (Anthracycline-associated resistance ARX)

|                                                                                                  |           |                           |
|--------------------------------------------------------------------------------------------------|-----------|---------------------------|
|                                                                                                  | LOC651924 | no reliable data obtained |
| Neural precursor cell expressed, developmentally down-regulated gene 9 (Nedd9), mRNA [NM_017464] | Nedd9     | 1.042                     |
| Cytosolic nucleoside triphosphate diphosphohydrolase 7 (Entpd7), mRNA [NM_053103]                | Entpd7    | 1.098                     |
| Brain derived neurotrophic factor (Bdnf), transcript variant 1, mRNA [NM_007540]                 | Bdnf      | 1.276                     |
| Interleukin 1 alpha (Il1a), mRNA [NM_010554]                                                     | Il1a      | no reliable data obtained |

---

**Supplemental Table 3B** The ratio of mRNA expressions of 70 genes which were not in Supplemental Table 3A, but were biologically closely related to A $\beta$  metabolisms in the brain.

| Description                                                                         | GeneName | Ratio of <i>Ttpa</i> <sup>-/-</sup> /WT |
|-------------------------------------------------------------------------------------|----------|-----------------------------------------|
| Insulin degrading enzyme (Ide), mRNA [NM_031156]                                    | Ide      | 0.720                                   |
| Epidermal growth factor (Egf), mRNA [NM_010113]                                     | Egf      | 0.787                                   |
| Matrix metalloproteinase 2 (Mmp2), mRNA [NM_008610]                                 | Mmp2     | 0.803                                   |
| ATP-binding cassette, sub-family B (MDR/TAP), member 1A (Abcb1a), mRNA [NM_011076]  | Abcb1a   | 0.804                                   |
| Low density lipoprotein receptor-related protein 2 (Lrp2), mRNA [NM_001081088]      | Lrp2     | 0.813                                   |
| Anterior pharynx defective 1c homolog (C. elegans) (Aph1c), mRNA [NM_026674]        | Aph1c    | 0.826                                   |
| Phospholipase C-alpha (PLC-alpha) mRNA, complete cds. [M73329]                      | Pdia3    | 0.853                                   |
| A disintegrin and metalloproteinase domain 10 (Adam10), mRNA [NM_007399]            | Adam10   | 0.865                                   |
| Matrix metalloproteinase 9 (Mmp9), mRNA [NM_013599]                                 | Mmp9     | 0.875                                   |
| Transthyretin (Ttr), mRNA [NM_013697]                                               | Ttr      | 0.875                                   |
| Platelet-derived growth factor, D polypeptide (Pdgfd), mRNA [NM_027924]             | Pdgfd    | 0.893                                   |
| Gelsolin (Gsn), mRNA [NM_146120]                                                    | Gsn      | 0.902                                   |
| Nerve growth factor, beta (Ngfb), mRNA [NM_013609]                                  | Ngfb     | 0.910                                   |
| Alpha-2-macroglobulin (A2m), mRNA [NM_175628]                                       | A2m      | 0.917                                   |
| Endothelin converting enzyme 2 (Ece2), mRNA [NM_139293]                             | Ece2     | 0.922                                   |
| Low density lipoprotein receptor (Ldlr), mRNA [NM_010700]                           | Ldlr     | 0.926                                   |
| Angiotensin I converting enzyme (peptidyl-dipeptidase A) 2 (Ace2), mRNA [NM_027286] | Ace2     | 0.929                                   |
| Beta-site APP-cleaving enzyme 2 (Bace2), mRNA [NM_019517]                           | Bace2    | 0.934                                   |
| RAS-related protein-1a (Rap1a), mRNA [NM_145541]                                    | Rap1a    | 0.935                                   |
| Ubiquilin 2 (Ubqln2), mRNA [NM_018798]                                              | Ubqln2   | 0.937                                   |
| Protein kinase C, theta (Prkcq), mRNA [NM_008859]                                   | Prkcq    | 0.938                                   |
| Anterior pharynx defective 1b homolog (C. elegans) (Aph1b), mRNA [NM_177583]        | Aph1b    | 0.938                                   |
| Membrane metallo endopeptidase (Mme), mRNA [NM_008604]                              | Mme      | 0.946                                   |
| A disintegrin and metalloproteinase domain 17 (Adam17), mRNA [NM_009615]            | Adam17   | 0.950                                   |
| Presenilin 2 (Psen2), mRNA [NM_011183]                                              | Psen2    | 0.958                                   |
| Thymoma viral proto-oncogene 2 (Akt2), mRNA [NM_007434]                             | Akt2     | 0.959                                   |
| Protein kinase C, mu (Prkcm), mRNA [NM_008858]                                      | Prkcm    | 0.965                                   |

|                                                                                       |        |       |
|---------------------------------------------------------------------------------------|--------|-------|
| Platelet-derived growth factor, C polypeptide (Pdgfc), mRNA [NM_019971]               | Pdgfc  | 0.965 |
| Protein kinase C, eta (Prkch), mRNA [NM_008856]                                       | Prkch  | 0.967 |
| Ubiquilin 1 (Ubqln1), transcript variant 1, mRNA [NM_026842]                          | Ubqln1 | 0.970 |
| Protein kinase C, zeta (Prkcz), transcript variant 1, mRNA [NM_008860]                | Prkcz  | 0.973 |
| Presenilin 1 (Psen1), mRNA [NM_008943]                                                | Psen1  | 0.982 |
| Glycogen synthase kinase 3 beta (Gsk3b), mRNA [NM_019827]                             | Gsk3b  | 0.985 |
| Protein kinase C, alpha (Prkca), mRNA [NM_011101]                                     | Prkca  | 0.991 |
| Thymoma viral proto-oncogene 3 (Akt3), mRNA [NM_011785]                               | Akt3   | 0.993 |
| Amyloid beta (A4) precursor protein (App), mRNA [NM_007471]                           | App    | 0.993 |
| ATP-binding cassette, sub-family B (MDR/TAP), member 1B (Abcb1b), mRNA [NM_011075]    | Abcb1b | 1.003 |
| Very low density lipoprotein receptor (Vldlr), mRNA [NM_013703]                       | Vldlr  | 1.006 |
| Thymoma viral proto-oncogene 1 (Akt1), mRNA [NM_009652]                               | Akt1   | 1.007 |
| Protein kinase C, epsilon (Prkce), mRNA [NM_011104]                                   | Prkce  | 1.009 |
| Tyrosine kinase 2 (Tyk2), mRNA [NM_018793]                                            | Tyk2   | 1.011 |
| Nicastrin (Ncstn), mRNA [NM_021607]                                                   | Ncstn  | 1.024 |
| Phospholipase D1 (Pld1), mRNA [NM_008875]                                             | Pld1   | 1.025 |
| RAS related protein 1b (Rap1b), mRNA [NM_024457]                                      | Rap1b  | 1.027 |
| Protein kinase C, nu (Prkcn), mRNA [NM_029239]                                        | Prkcn  | 1.029 |
| Ubiquilin 1 (Ubqln1), transcript variant 2, mRNA [NM_152234]                          | Ubqln1 | 1.036 |
| Presenilin enhancer 2 homolog (C. elegans) (Psenen), mRNA [NM_025498]                 | Psenen | 1.040 |
| Beta-site APP cleaving enzyme 1 (Bace1), mRNA [NM_011792]                             | Bace1  | 1.050 |
| Low density lipoprotein receptor-related protein 1 (Lrp1), mRNA [NM_008512]           | Lrp1   | 1.053 |
| A disintegrin and metallopeptidase domain 9 (meltrin gamma) (Adam9), mRNA [NM_007404] | Adam9  | 1.059 |
| RAS-related C3 botulinum substrate 1 (Rac1), mRNA [NM_009007]                         | Rac1   | 1.059 |
| Platelet derived growth factor, alpha (Pdgfa), mRNA [NM_008808]                       | Pdgfa  | 1.062 |
| Protein kinase C, beta 1 (Prkcb1), mRNA [NM_008855]                                   | Prkcb1 | 1.071 |
| Somatostatin (Sst), mRNA [NM_009215]                                                  | Sst    | 1.074 |
| Protein kinase C, delta (Prkcd), mRNA [NM_011103]                                     | Prkcd  | 1.083 |
| Serum response factor (Srf), mRNA [NM_020493]                                         | Srf    | 1.111 |
| Endothelin converting enzyme 1 (Ece1), mRNA [NM_199307]                               | Ece1   | 1.131 |
| Glycogen synthase kinase 3 alpha (Gsk3a), mRNA [NM_001031667]                         | Gsk3a  | 1.134 |
| Anterior pharynx defective 1a homolog (C. elegans) (Aph1a), mRNA [NM_146104]          | Aph1a  | 1.139 |

|                                                                               |       |                           |
|-------------------------------------------------------------------------------|-------|---------------------------|
| Tyrosine kinase (arg) mRNA, partial cds. [U40827]                             | Abl2  | 1.140                     |
| Platelet derived growth factor, B polypeptide (Pdgfb), mRNA [NM_011057]       | Pdgfb | 1.144                     |
| Protein kinase C, iota (Prkci), mRNA [NM_008857]                              | Prkci | 1.167                     |
| Plasminogen activator, tissue (Plat), mRNA [NM_008872]                        | Plat  | 1.177                     |
| Protein kinase C, gamma (Prkcc), mRNA [NM_011102]                             | Prkcc | 1.218                     |
| Advanced glycosylation end product-specific receptor (Ager), mRNA [NM_007425] | Ager  | no reliable data obtained |
| G-protein coupled receptor 3 (Gpr3), mRNA [NM_008154]                         | Gpr3  | no reliable data obtained |
| Interferon gamma (Ifng), mRNA [NM_008337]                                     | Ifng  | no reliable data obtained |
| Matrix metalloproteinase 3 (Mmp3), mRNA [NM_010809]                           | Mmp3  | no reliable data obtained |
| Plasminogen activator, urokinase (Plau), mRNA [NM_008873]                     | Plau  | no reliable data obtained |
| Rhodopsin (Rho), mRNA [NM_145383]                                             | Rho   | no reliable data obtained |

---



### **Supplemental Methods for Supplemental Table 3**

#### *Gene chip analysis*

Three 23-month-old *Ttpa*<sup>-/-</sup> and three wild-type littermate mice were examined. Total RNA was extracted from the brains using MirVana kit (Ambion, Austin, TX). An aliquot (0.5 µg) of RNA solution was used for preparation of cyanine3-labeled cRNA for hybridization to high-density oligonucleotide arrays. Cyanine3-labeled RNA samples were hybridized to a gene chips (Whole Mouse Genome Oligo Microarray; Agilent Technologies, Santa Clara CA). The images of hybridization signals were scanned with the Agilent Technologies Microarray Scanner. We analyzed 41,252 genes by GeneSpring (Agilent Technologies).

#### *Quantitative reverse transcription polymerase chain reaction (qRT-PCR)*

The extracted RNAs were also reverse-transcribed with Superscript III and random hexamers (Invitrogen, Carlsbad, CA). The qRT-PCR was performed using the LightCycler 480 Probes Master (Roche Diagnostics, Rotkreuz, Switzerland), in accordance with the manufacturer's instructions. The amplification conditions were 45 cycles of denaturation at 95 °C for 10 seconds and annealing at 60 °C for 30 seconds and 72 °C for 1 second with Light Cycler 480 II (Roche Diagnostics). Primers for mouse *Ide* and glyceraldehyde-3-phosphate dehydrogenase (*Gapdh*) mRNAs were designed by Applied Biosystems (Foster City, CA) and *Gapdh* was used to normalize the qRT-PCR values.

### **Supplemental Results for Supplemental Table 3**

*mRNA level of IDE was most influenced in Ttpa*<sup>-/-</sup> *mouse brains concerning of AD related genes.*

By the gene chip analysis, we evaluated important genes associated with AD pathology, which are listed in an online database of AlzGene (<http://www.alzgene.org>) (1). We showed the results of top 31 gene expressions in the AlzGene profile (Supplemental Table 3A). Out of 31 genes, 2 genes, *Ch25h* and *Il1b*, were reduced by more than 20%, and 2 genes, *Bdnf* and *Pgbd1*, were increased by more than 20% in *Ttpa*<sup>-/-</sup> mice. Moreover, we also listed the results of the genes which were biologically closely related to Aβ metabolism in the brain (2-6) (Supplemental Table 3B). Two genes, *Ide* and *Egf*, were decreased and only *Prkcc* was increased by more than 20% in *Ttpa*<sup>-/-</sup> mice. The followings are explanations of potential biological roles/influences of each 7 gene on Aβ metabolism.

Altered-regulated genes in AlzGene profiling list

- 1) Cholesterol 25-hydroxylase (*Ch25h*) polymorphisms are possibly associated with different rates of brain A $\beta$  deposition (7). However the relationship between the expression level of *Ch25h* and A $\beta$  metabolism is unknown.
- 2) RIKEN cDNA 4921509E05 gene (*Pgbd1*) polymorphisms are possibly associated with AD. However, its function is unknown.
- 3) Interleukin 1 beta (*Il1b*) is an inflammatory cytokine that could stimulate  $\gamma$ -secretase activity and increases the production of A $\beta$  (8).
- 4) Brain derived neurotrophic factor (*Bdnf*) exerts substantial protective effects on crucial neuronal circuitry involved in AD, acting through amyloid-independent mechanisms (9). However, it has been also reported that the interruption of BDNF signaling in hippocampal neurons rapidly activates the amyloidogenic pathway and causes neuronal apoptotic death (10).

#### Down regulated genes in A $\beta$ metabolism-related genes

- 1) Insulin degrading enzyme (*Ide*) is one of A $\beta$  degradation enzymes.
- 2) Stimulation of receptor tyrosine kinases, such as the receptors for epidermal growth factor (EGF), make BACE activity and subsequent A $\beta$  production enhanced in cultured cells as well as in mouse hippocampus (11).

#### Up regulated genes in A $\beta$ metabolism-related genes

- 1) Concerning of protein kinase C, gamma (*Prkcc*), the inhibition or impairment of PKC activity leads to compromised learning and memory, whereas an appropriate activation of PKC isozymes has been found to enhance learning and memory and/or to produce antidementic effects (12).

The decreased expression of *Ide* is the only biologically reasonable change which can be responsible for the enhanced accumulation of A $\beta$  in the brain, and in contrast, expression change of other six genes were predicted to reduce A $\beta$  accumulation except for those of *Ch25h* and *Pgbd1* of unknown function.

Therefore, we furthermore confirmed the expression change of *Ide* in *Ttpa*<sup>-/-</sup> mice brains by qRT-PCR, which is almost same result; reduction of the mRNA levels of IDE was 36.4% by qRT-PCR (38.0% by gene chip analysis) .

#### **REFERENCES for Supplemental Table 3**

1. Bertram, L., McQueen, M. B., Mullin, K., Blacker, D., and Tanzi, R. E. (2007) *Nat Genet* **39**, 17-23

2. Zhou, S., Zhou, H., Walian, P. J., and Jap, B. K. (2007) *Biochemistry* **46**, 2553-2563
3. Dewachter, I., and Van, Leuven, F. (2002) *Lancet Neurol* **1**, 409-416
4. Iwata, N., Higuchi, M., and Saido, T. C. (2005) *Pharmacol Ther* **108**, 129-148
5. Deane, R., and Zlokovic, B. V. (2007) *Curr Alzheimer Res* **4**, 191-197
6. Nishimura, M. (2004) *Mol Med* **41**, 409-415
7. Papassotiropoulos, A., Lambert, J. C., Wavrant-De, Vrièze, F., Wollmer, M. A., von, der, Kammer, H., Streffer, J. R., Maddalena, A., Huynh, K. D., Wolleb, S., Lutjohann, D., Schneider, B., Thal, D. R., Grimaldi, L. M., Tsolaki, M., Kapaki, E., Ravid, R., Konietzko, U., Hegi, T., Pasch, T., Jung, H., Braak, H., Amouyel, P., Rogaeve, E. I., Hardy, J., Hock, C., and Nitsch, R. M. (2005) *Neurodegener Dis* **2**, 233-241
8. Liao, Y. F., Wang, B. J., Cheng, H. T., Kuo, L. H., and Wolfe, M. S. (2004) *J Biol Chem* **19**, 49523-49532
9. Nagahara, A. H., Merrill, D. A., Coppola, G., Tsukada, S., Schroeder, B. E., Shaked, G. M., Wang, L., Blesch, A., Kim, A., Conner, J. M., Rockenstein, E., Chao, M. V., Koo, E. H., Geschwind, D., Masliah, E., Chiba, A. A., and Tuszynski, M. H. (2009) *Nat Med* **15**, 331-337
10. Matrone, C., Ciotti, M. T., Mercanti, D., Marolda, R., and Calissano, P. (2008) *Proc Natl Acad Sci U S A* **105**, 13139-13144
11. Zou, L., Wang, Z., Shen, L., Bao, G. B., Wang, T., Kang, J. H., and Pei, G. (2007) *Cell Res* **17**, 389-401
12. Sun, M. K., and Alkon, D. L. (2006) *Recent Pat CNS Drug Discov* **1**, 147-156
